# Supplementary material
Source: PubMed Central journal article supplement (PMC6917844)

## 1 Supplemental Figure Legends

2 **Figure S1. Validation of CD11c Itgax-DTR chimeras.** (A) Representative flow plots of  
3 chimerism with Itgax DTR and host cells in uninfected, untreated chimeras. (B) Quantification  
4 of chimerism with Itgax DTR and host cells in uninfected, untreated chimeras. (C)  
5 Representative flow plots and quantification of total monocytes and monocyte subsets in the lung  
6 10 days post infection showing lack of depletion of monocytes in DTx treated animals. (D)  
7 Example staining of D14 post-infection DTx- and PBS-treated chimeras, showing CD69 and  
8 CD103 staining on flu-specific CD8 T cells in the lung. (E) Number of FluNP-specific CD8 T  
9 cells in the extra-vascular compartment of the lung (LEV), CD69+ CD103+ cells of the extra-  
10 vascular compartment (LRM) and airways (BAL) on day 14 post infection.

11 **Figure S2. Gating strategy for pulmonary APCs.** (A) Representative flow plots and gating  
12 strategy for the identification of extravascular pulmonary APC subsets of C57BL/6J mice  
13 intranasally infected with x31 influenza virus. Discrimination of vascular versus extra vascular  
14 cells via i.v. staining with anti-CD45.2 was performed in each experiment as shown. plots are  
15 representative of 3 independent experiments with 5 mice used in each experiment.

16 **Figure S3. Number of APCs in the lung of WT and CCR2<sup>-/-</sup> mice 10 days post infection**  
17 **with x31 influenza virus.** (A) Representative flow plots of APCs present in WT and CCR2<sup>-/-</sup>  
18 mouse lungs on day 10 post-infection. (B) Number of extra-vascular classical and non-classical  
19 monocytes (left graph) or DC subsets (right graph) in the lungs of WT and CCR2<sup>-/-</sup> mice on day  
20 10 post-infection. All graphs error bars are S.E.M. Data are representative of 3 independent  
21 experiments with 5 mice per time point. \* p<0.05 n.s. p>0.05(two-tailed Student's *t*-test).

22 **Figure S4. Depletion of non-classical monocytes in CX3CR1-DTR mice has no effect upon**  
23 **lung T<sub>RM</sub> generation following influenza infection.** (A) Graph and representative flow plots of

1 the frequency of total lymphocytes in the lung and spleen derived from donor bone marrow  
2 versus host lymphocytes 6 weeks after chimera production. Gated to exclude CD45- singlet  
3 lymphocytes. (B) Graph and representative flow plots of the frequency of classical and non-  
4 classical monocytes in the lung and spleen of chimeras treated with DTx or PBS 10 days post  
5 infection. Plots are gated on MHC-II lo, Ly6g-, CD11b+, CD11c- singlet lymphocytes.(C) Graph  
6 of the number of OT-I CD8 T cells day 45 post infection in PBS and DTx treated mice in the  
7 lung extra-vascular compartment (LEV), bronchoalveolar lavage (BAL), and spleen, and graph  
8 of the number of CD69+ CD103+ OT-I CD8 T cells day 45 post infection in PBS and DTx  
9 treated mice in the lung-extra vascular compartment and bronchoalveolar lavage. All error bars  
10 are S.E.M. \*  $p < 0.05$  n.s.  $p > 0.05$  (two-tailed Student's *t*-test) Data are representative of two  
11 independent experiments.

12

13 **Figure S5. Phenotype of OT-I T cells after three days of in vitro stimulation with lung APC**  
14 **subsets.** (A) Representative flow plots of CD127 staining on CD8 OT-I T cells following three  
15 days of *in vitro* culture with OVA peptide pulsed monocytes of indicated subtypes. (B)  
16 Frequencies of CD127 positivity among highly divided CD8 OT-I T cells following three days of  
17 *in vitro* culture with OVA peptide pulsed monocytes of indicated subtypes. Error bars SEM, data  
18 represents 3 experiments using 3 technical replicates *in vitro* each. (C) Representative flow plots  
19 of CD103+ staining on CD8 OT-I T cells following three days of *in vitro* culture with OVA  
20 peptide pulsed monocytes of indicated subtypes. (D) Representative flow plots of CD69+  
21 staining on CD8 OT-I T cells following three days of *in vitro* culture with OVA peptide pulsed  
22 monocytes of indicated subtypes.

**a**

D10 Chimerism Data

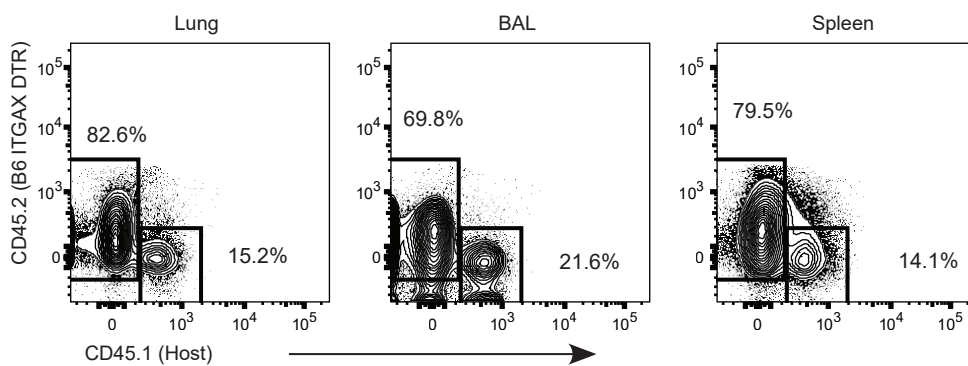

**b**

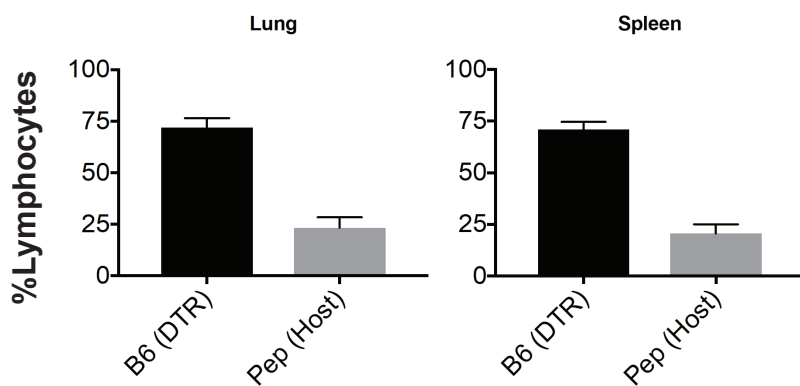

**c**

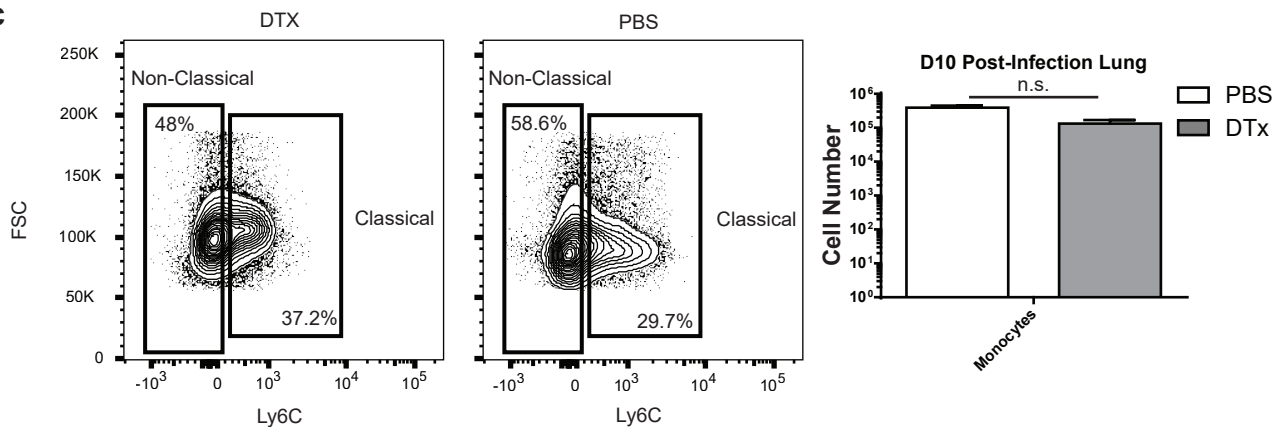

**d**

D14 Lungs

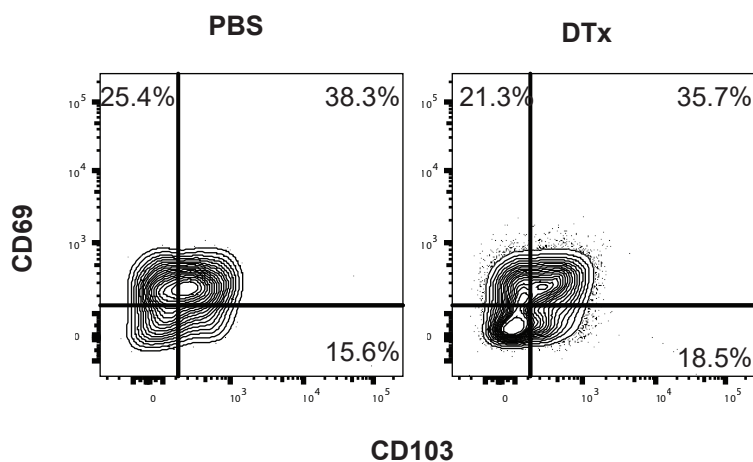

**e**

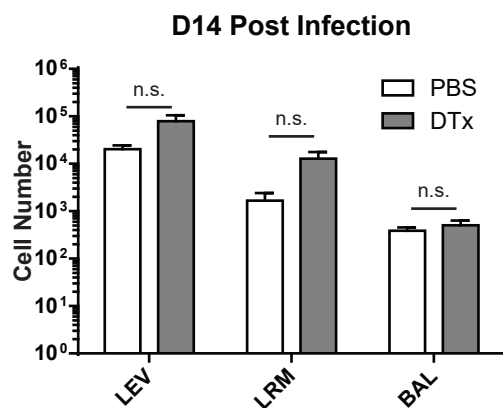

Figure S24

**a**

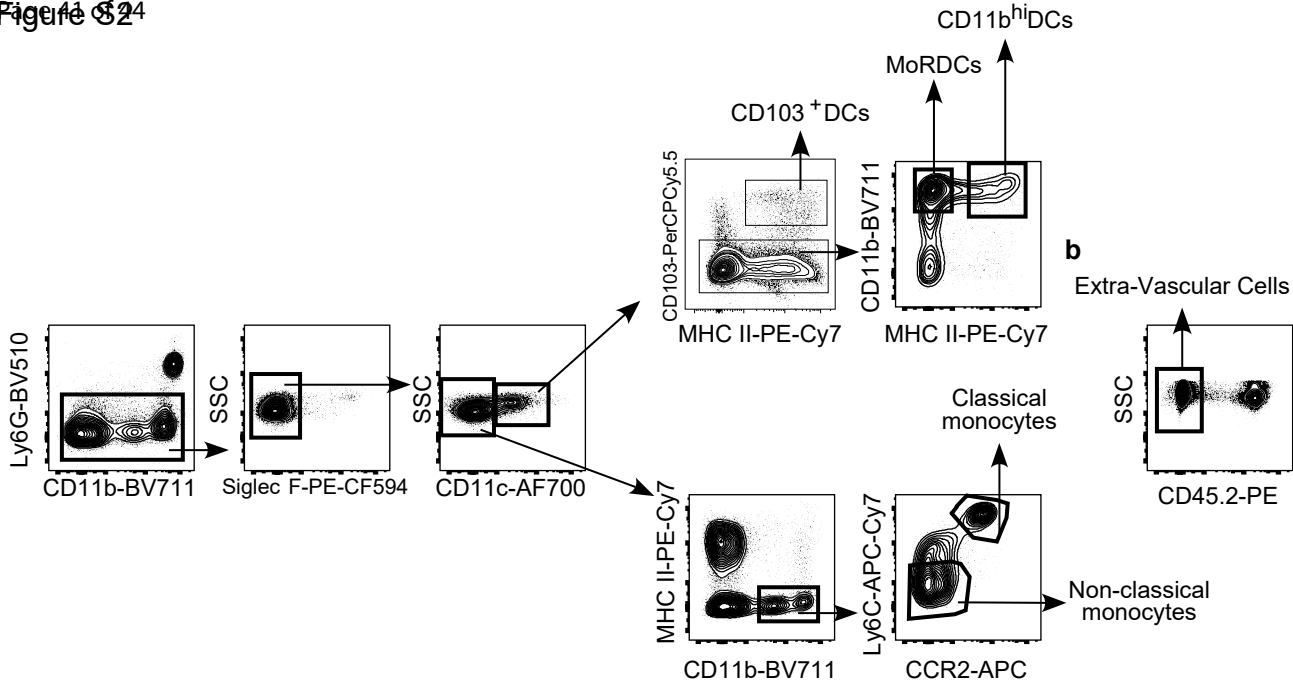

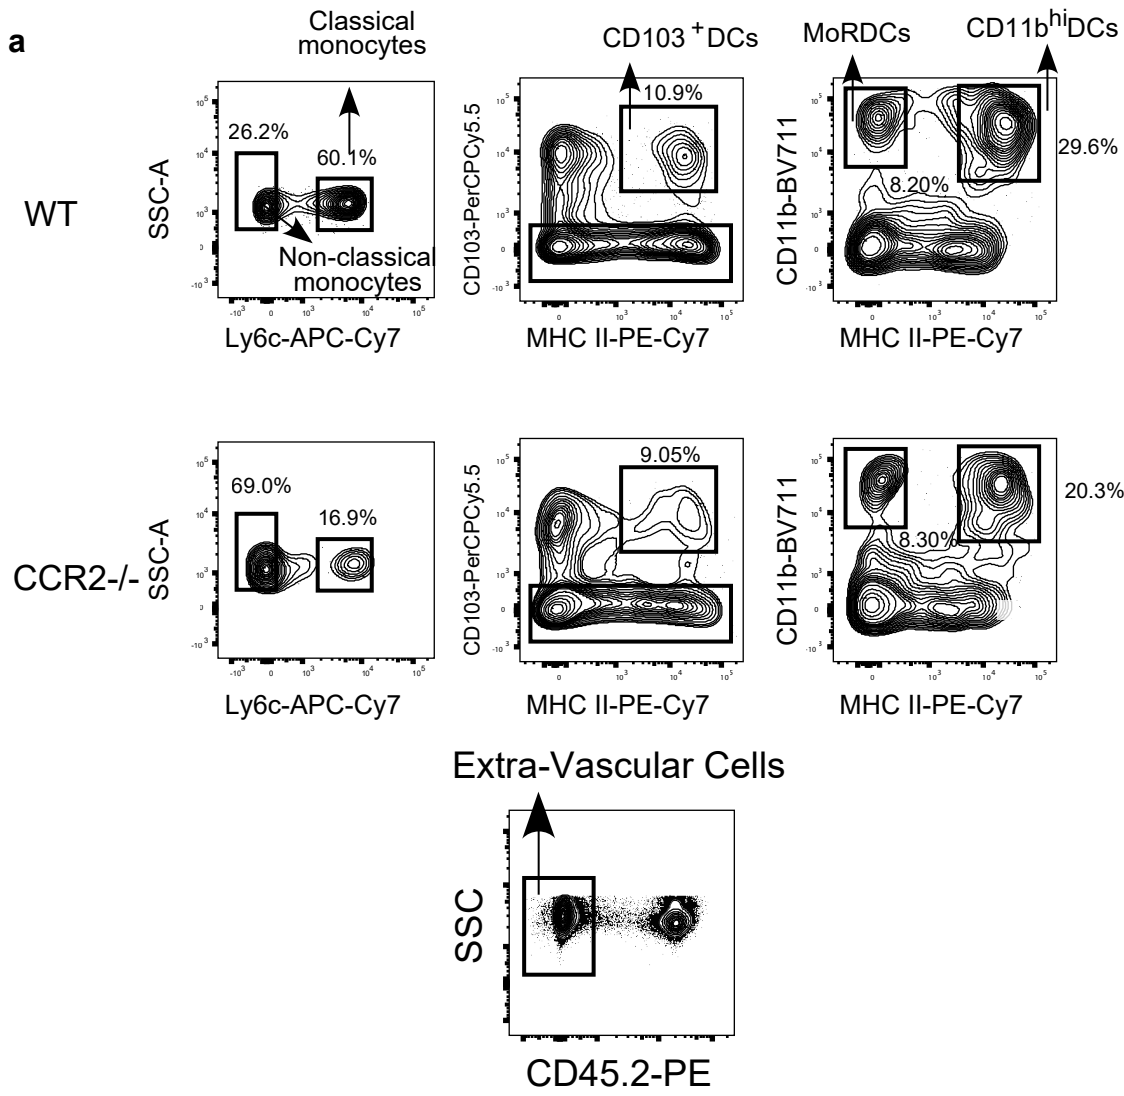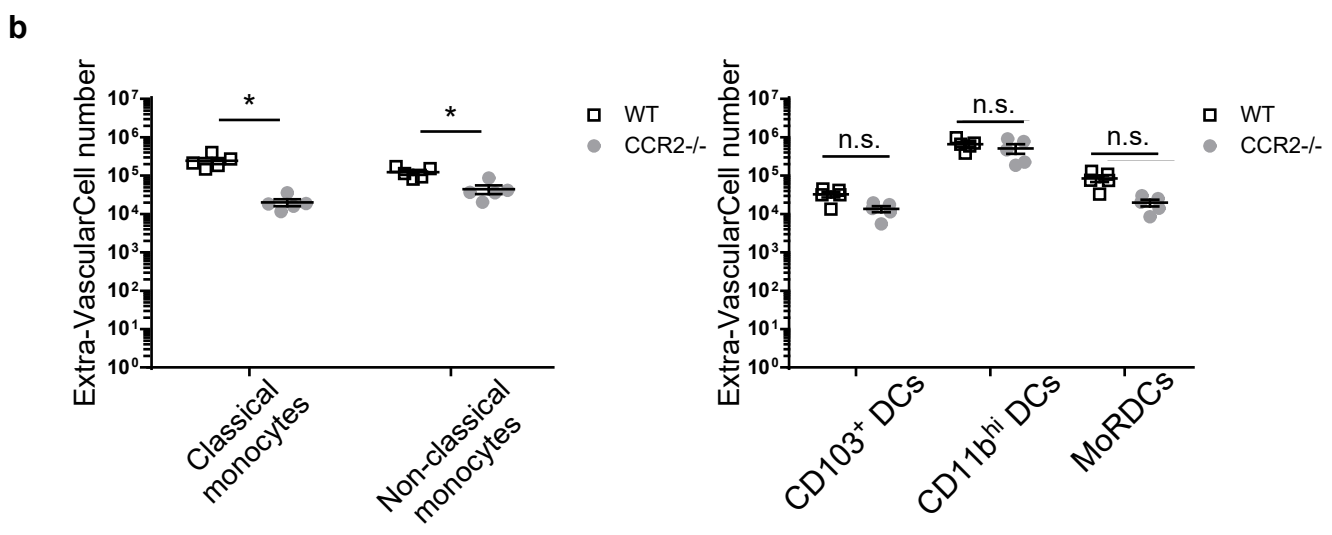

**Figure S4**  
Page 3 of 4

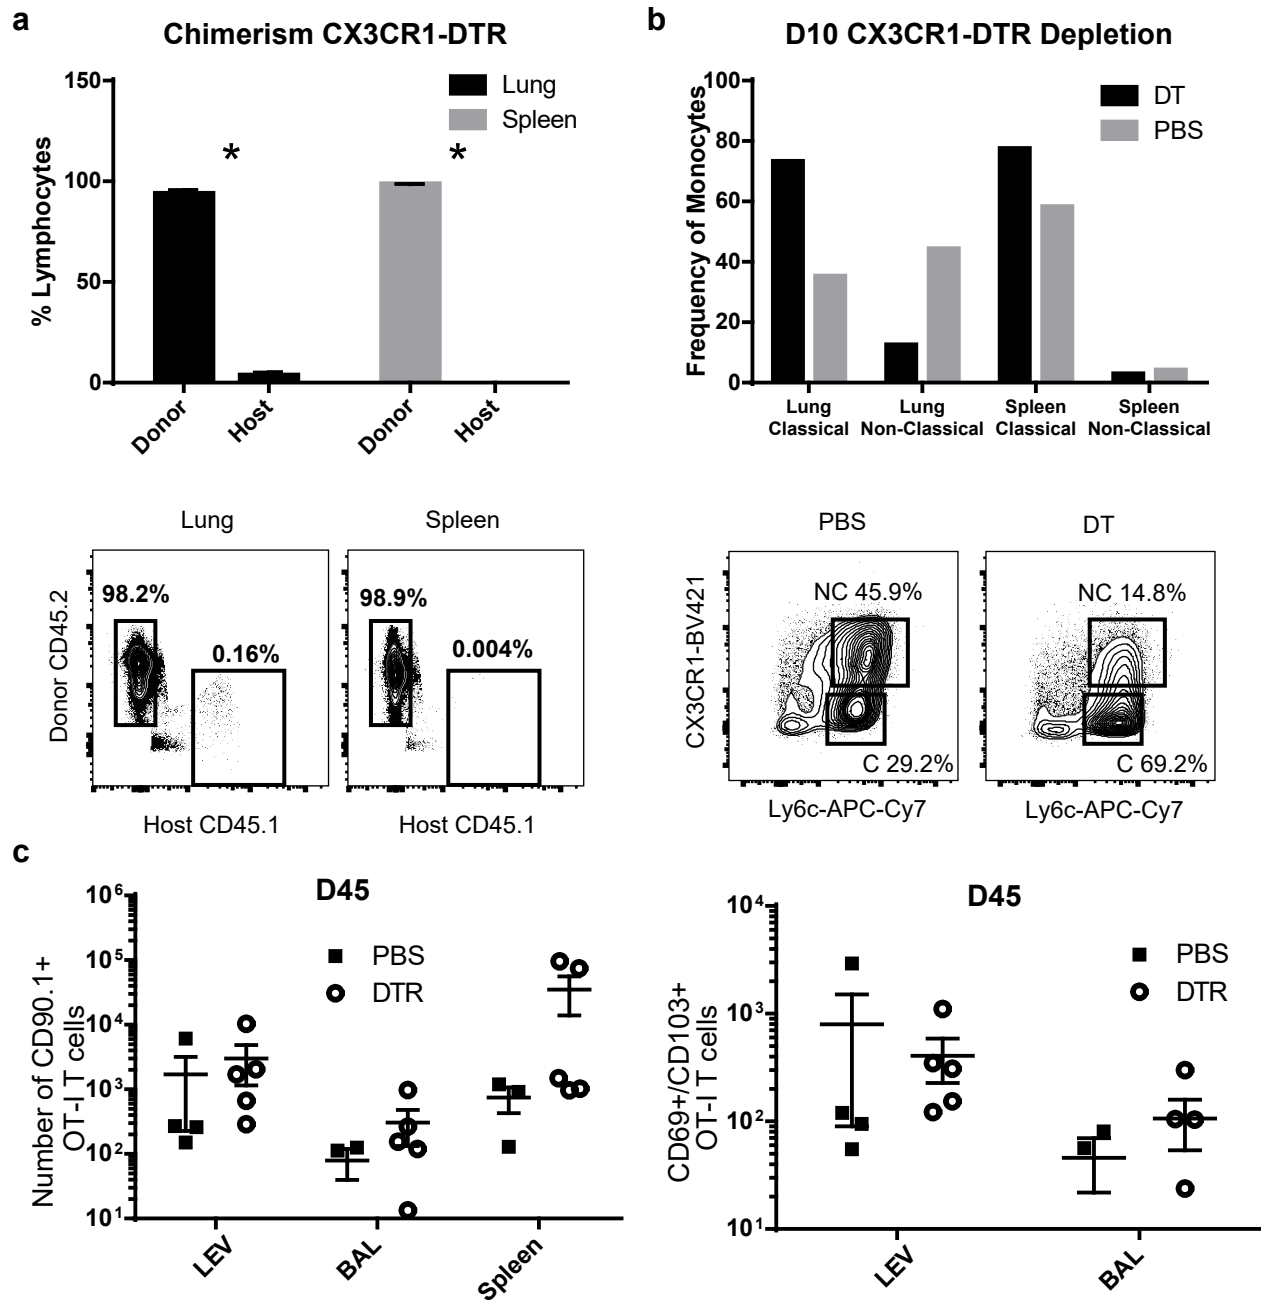

Figure S5

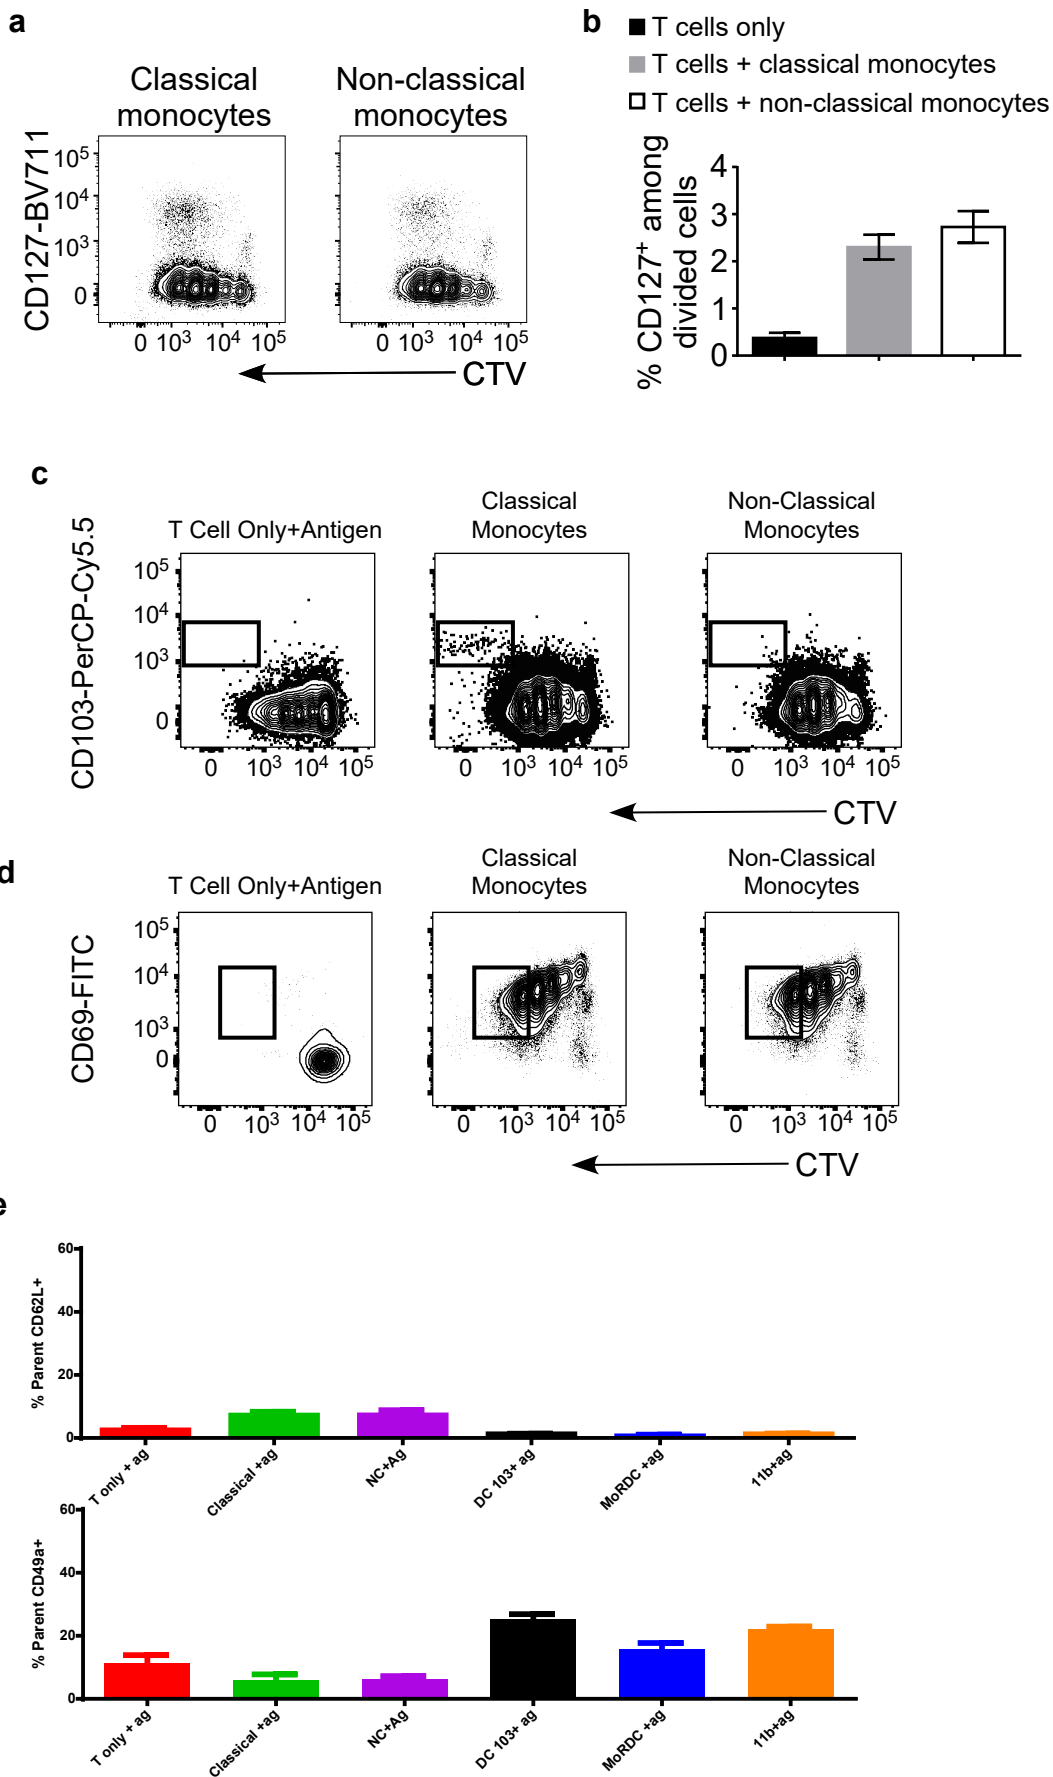

Supplement: NIHMS1541584-supplement-1.pdf [file NIHMS1541584-supplement-1.pdf]
